# Supplementary material
Source: publisher figshare collection journal article supplement (https://acs.figshare.com/ndownloader/files/4682428)
Supplement: Supplementary file 1 [file 4682428]

## **Supplementary Materials**

### **Specific Ion Effects on Interfacial Water Structure near Macromolecules**

Xin Chen, Tinglu Yang, Sho Kataoka, and Paul S. Cremer<sup>\*</sup>

Department of Chemistry, Texas A&M University, College Station, TX 77843

May 29, 2007

E-mail: [cremer@mail.chem.tamu.edu](mailto:cremer@mail.chem.tamu.edu)

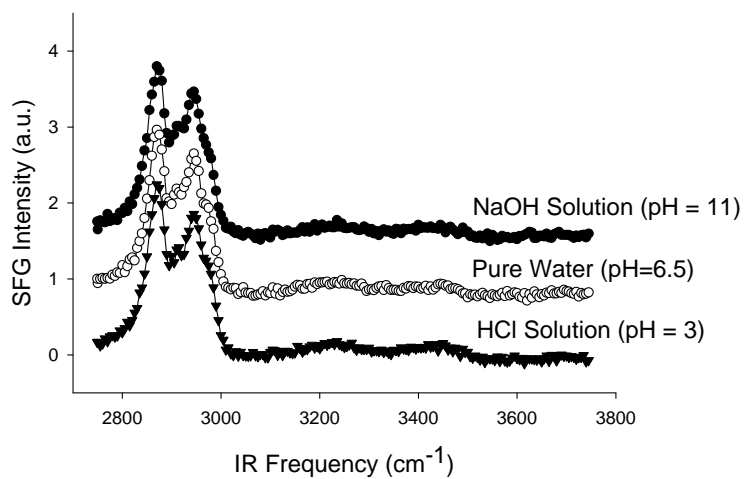

**Figure S1.** VSFS spectra of the air/PNIPAM/aqueous interface as a function of pH. The acidic and basic solutions were prepared by adding HCl and NaOH, respectively, with no additional salts. The spectrum of pure water is the same as the one in Figure 2b. The spectra are offset for clarity.

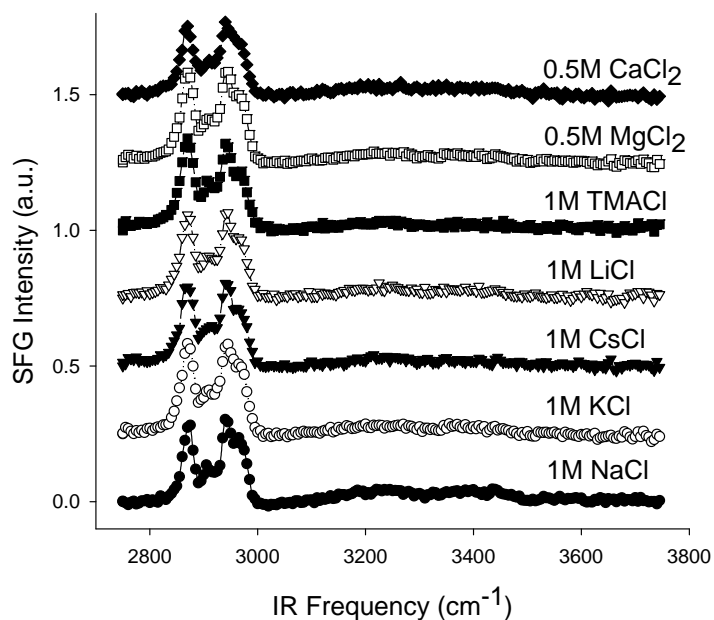

**Figure S2. VSFS spectra of the air/PNIPAM/Aqueous interface as a function of cation identity.** All experiments were conducted with 1 M  $\text{Cl}^-$ . This dictated using lower molar concentrations of  $\text{MgCl}_2$  and  $\text{CaCl}_2$ . Other choices such as keeping the cation concentration or the ionic strength constant would, of course, have been possible. However, these were judged to be less desirable because changes in  $\text{Cl}^-$  concentration have a non-negligible effect on the water structure (Figure 4a). It would have also been possible to use  $\text{F}^-$  or  $\text{SO}_4^{2-}$  salts; however, many of these salts have only limited solubility in aqueous solution. The spectra are offset to avoid crowding

**Table S1. Oscillator Strengths of Water Peaks as well as Relative Surface Potential Values for Air/PNIPAM/Aqueous Systems with 1 M Salt (~0.8 M for NaF and Na<sub>2</sub>SO<sub>4</sub>)**

|                                 |                       | NaSCN      | NaClO <sub>4</sub> | NaI         | NaNO <sub>3</sub> | NaBr        | NaCl        | NaF         | Na <sub>2</sub> SO <sub>4</sub> |
|---------------------------------|-----------------------|------------|--------------------|-------------|-------------------|-------------|-------------|-------------|---------------------------------|
| Oscillator                      | 3200 cm <sup>-1</sup> | 0.58       | 0.52               | 0.48        | 0.32              | 0.30        | 0.23        | 0.14        | 0.14                            |
| Strength (a.u.)                 | 3400 cm <sup>-1</sup> | 0.35       | 0.31               | 0.30        | 0.22              | 0.24        | 0.22        | 0.15        | 0.15                            |
| $\Delta$ Surface Potential (mV) |                       | -69        | -58                | -60         | -22               | -33         | -8          | 13          | 4                               |
|                                 |                       | ( $\pm$ 8) | ( $\pm$ 12)        | ( $\pm$ 23) | ( $\pm$ 10)       | ( $\pm$ 15) | ( $\pm$ 12) | ( $\pm$ 19) | ( $\pm$ 17)                     |

**Table S2. Relative Surface Potential Values of the Air/PNIPAM/Aqueous System with Varying Concentrations of NaSCN and NaClO<sub>4</sub> in the Subphase. (unit: mV)**

|                    | 0.01M       | 0.03M       | 0.1M        | 0.3M        | 0.6M        | 1M          | 1.5M        | 2M          |
|--------------------|-------------|-------------|-------------|-------------|-------------|-------------|-------------|-------------|
| NaSCN              | -16         | -35         | -54         | -66         | -60         | -69         | -60         | -66         |
|                    | ( $\pm$ 18) | ( $\pm$ 15) | ( $\pm$ 13) | ( $\pm$ 12) | ( $\pm$ 12) | ( $\pm$ 9)  | ( $\pm$ 13) | ( $\pm$ 11) |
| NaClO <sub>4</sub> | -24         | -36         | -51         | -68         | -59         | -58         | -58         | -47         |
|                    | ( $\pm$ 13) | ( $\pm$ 18) | ( $\pm$ 12) | ( $\pm$ 18) | ( $\pm$ 14) | ( $\pm$ 12) | ( $\pm$ 16) | ( $\pm$ 9)  |
